# Supplementary material for: Using Multitemporal Landsat ETM+ Imagery to Determine a Sustainable Exploitation Patterns of the Forest Resources in the Moldo-Transylvanian Carpathians - Romania
Source: Preprints.org preprint supplement (doi:10.20944/preprints201807.0336.v1), 2018-07-18
Supplement: Supplementary file 1 [file Figure S1.docx]

*Supplementary Material to:*

**Using multitemporal Landsat ETM+ imagery to determine deforestation patterns in the Moldo-Transylvanian Carpathians – Romania**

Ana-Maria Ciobotaru1,2,3,†, Ion Andronache1,2,†, Helmut Ahammer4,†, Herbert F. Jelinek5,6,†, Marko Radulović7,†, Radu-Daniel Pintilii1,2,3,†,*, Daniel Peptenatu1,2,3,†, Cristian-Constantin Drăghici1,2,3,†, Răzvan-Mihail Papuc8,†, Roxana-Andreea Radu1,3,†, Alexandra Grecu1,3,†, Andreea-Karina Gruia1,3,†, Marian Marin1,3,†, Adrian-Gabriel Simion1,3,†, Mircea-Cristian Vișan1,3,†, Ioan-Vlad Loghin3,†, and Rasmus Fensholt9,†

Figure S1: Macro used in ImageJ 1.51 program

// This macro measures the area and the percentage of the foreground (forest) pixels in 8-bit binary image from Moldo-Transylvanian Carpathians:

dir = getDirectory("path");

list = getFileList(dir);

for (i=0; i<list.length; i++)

{

if (endsWith(list[i], ".tif"))

{

open(dir + list[i]);

run("8-bit");

setAutoThreshold("Default");

// change scale from pixels to km

run("Set Scale...", "distance=17.325 known=1 pixel=1 unit=km");

// measure area and area fraction

run("Set Measurements...", "area area_fraction limit display redirect=None decimal=3");

run("Measure");

selectWindow("Results");

close();

}

}
