# Supplementary material for: Using Multitemporal Landsat ETM+ Imagery to Determine a Sustainable Exploitation Patterns of the Forest Resources in the Moldo-Transylvanian Carpathians - Romania
Source: Preprints.org preprint supplement (doi:10.20944/preprints201807.0336.v1), 2018-07-18
Supplement: Supplementary file 2 [file Figure S2.docx]

*Supplementary Material to:*

**Using multitemporal Landsat ETM+ imagery to determine deforestation patterns in the Moldo-Transylvanian Carpathians – Romania**

Ana-Maria Ciobotaru1,2,3,†, Ion Andronache1,2,†, Helmut Ahammer4,†, Herbert F. Jelinek5,6,†, Marko Radulović7,†, Radu-Daniel Pintilii1,2,3,†,*, Daniel Peptenatu1,2,3,†, Cristian-Constantin Drăghici1,2,3,†, Răzvan-Mihail Papuc8,†, Roxana-Andreea Radu1,3,†, Alexandra Grecu1,3,†, Andreea-Karina Gruia1,3,†, Marian Marin1,3,†, Adrian-Gabriel Simion1,3,†, Mircea-Cristian Vișan1,3,†, Ioan-Vlad Loghin3,†, and Rasmus Fensholt9,†

**Figure S2:** Video material presents the extension of the deforested areas in Moldo-Transylvanian Carpathians (2000-2014). In red pixels, the deforested areas are illustrated. The green pixels represent forests from the study area.
