# Supplementary material for: Using Multitemporal Landsat ETM+ Imagery to Determine a Sustainable Exploitation Patterns of the Forest Resources in the Moldo-Transylvanian Carpathians - Romania
Source: Preprints.org preprint supplement (doi:10.20944/preprints201807.0336.v1), 2018-07-18
Supplement: Supplementary file 3 [file Figure S3 Calimani.docx]

| **Figure S3a**: The extent of deforestation process in Călimani Mountains for period 2001-2014 | |
| --- | --- |
| 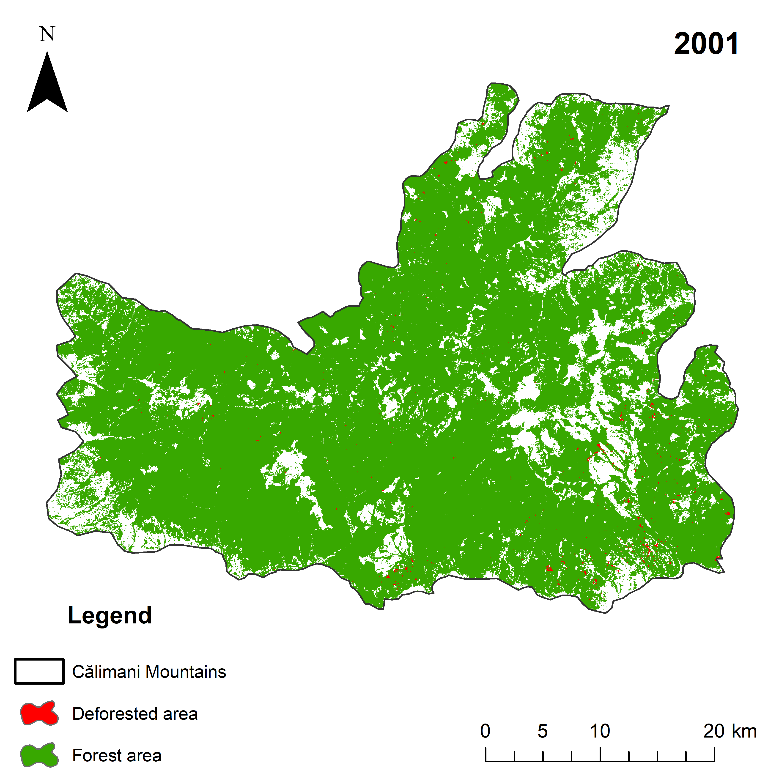 | 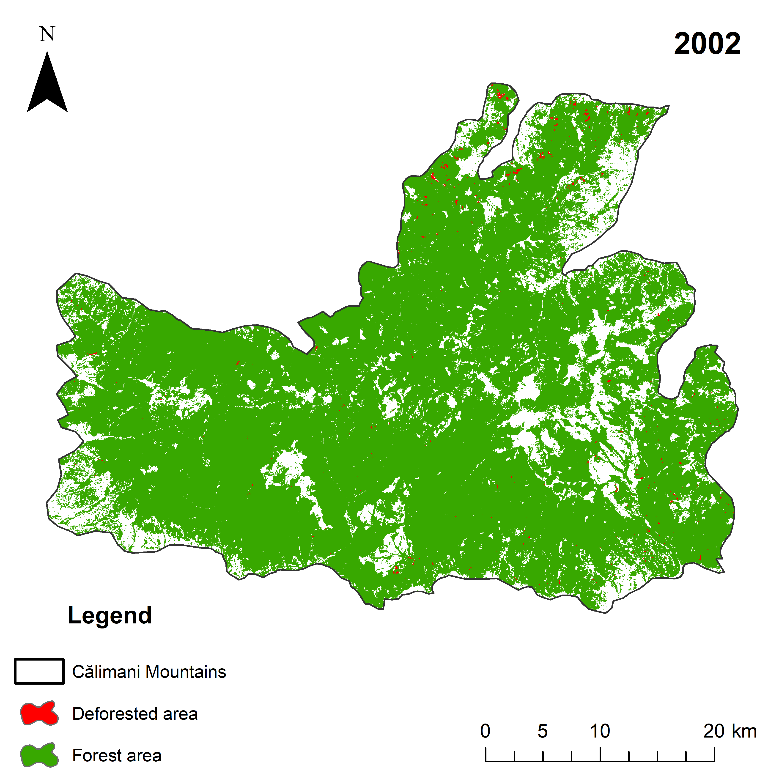 |
| 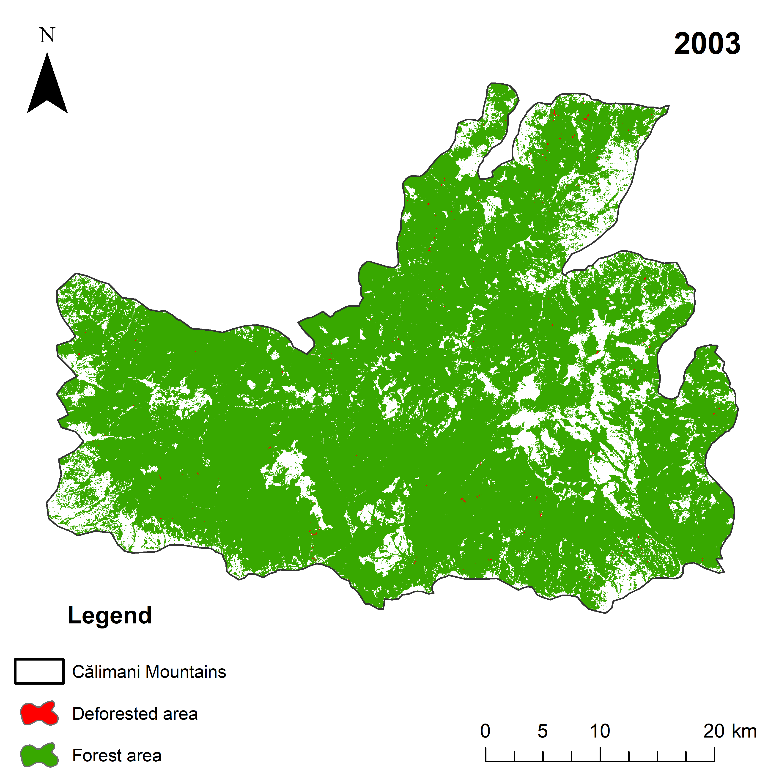 | 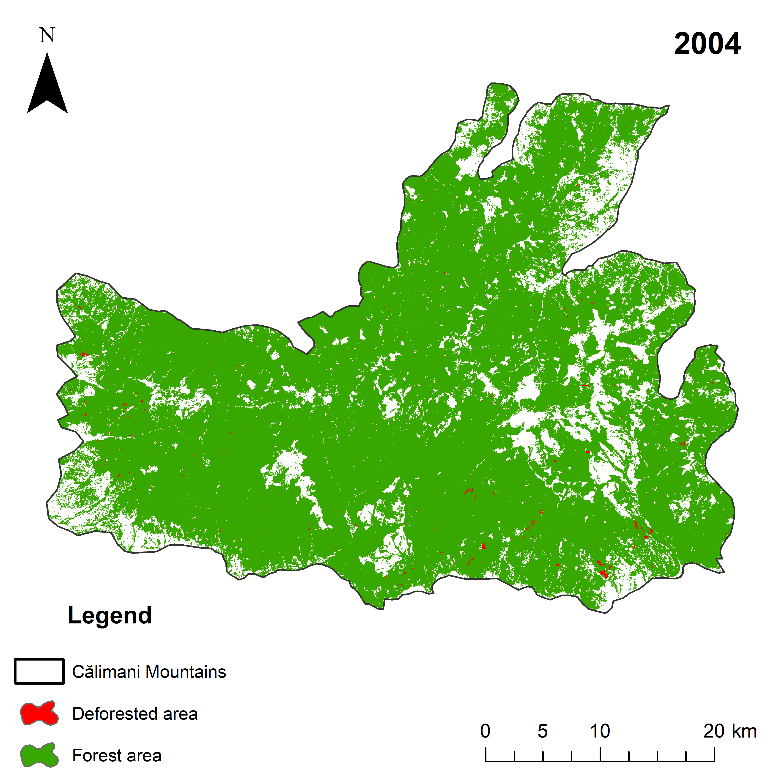 |

*Supplementary Material to:*

**Using multitemporal Landsat ETM+ imagery to determine deforestation patterns in the Moldo-Transylvanian Carpathians – Romania**

**Ana-Maria Ciobotaru**1,2,3,†**, Ion Andronache**1,2,†**, Helmut Ahammer**4,†**, Herbert F. Jelinek**5,6,†**, Marko Radulović**7,†**, Radu-Daniel Pintilii**1,2,3,†,***, Daniel Peptenatu**1,2,3,†**, Cristian-Constantin Drăghici**1,2,3,†**, Răzvan-Mihail Papuc**8,†**, Roxana-Andreea Radu**1,3,†, **Alexandra Grecu**1,3,†**, Andreea-Karina Gruia**1,3,†**, Marian Marin**1,3,†**, Adrian-Gabriel Simion**1,3,†, **Mircea-Cristian Vișan**1,3,†**, Ioan-Vlad Loghin**3,†**, and Rasmus Fensholt**9,†

| 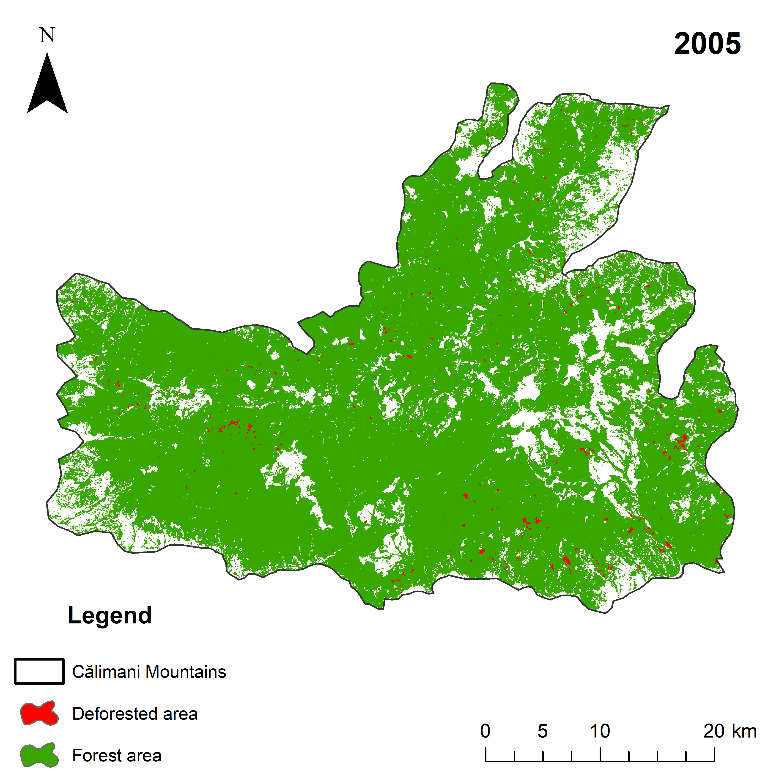 | 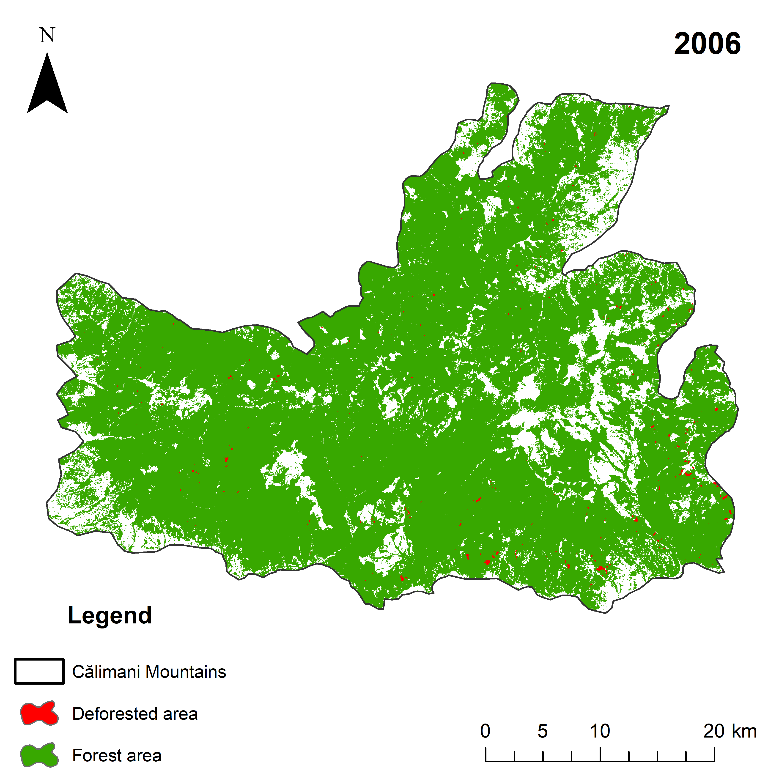 |
| --- | --- |
| 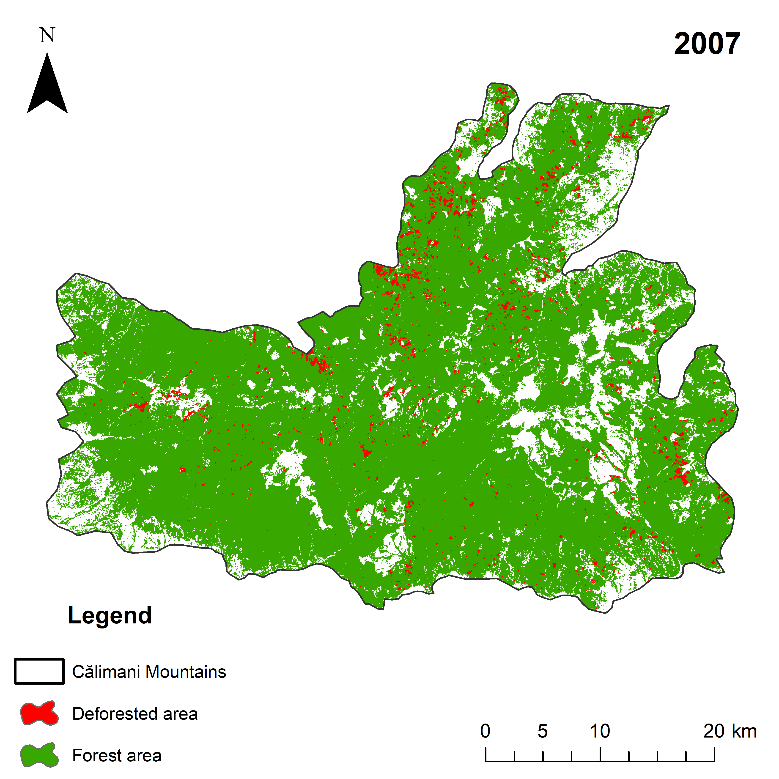 | 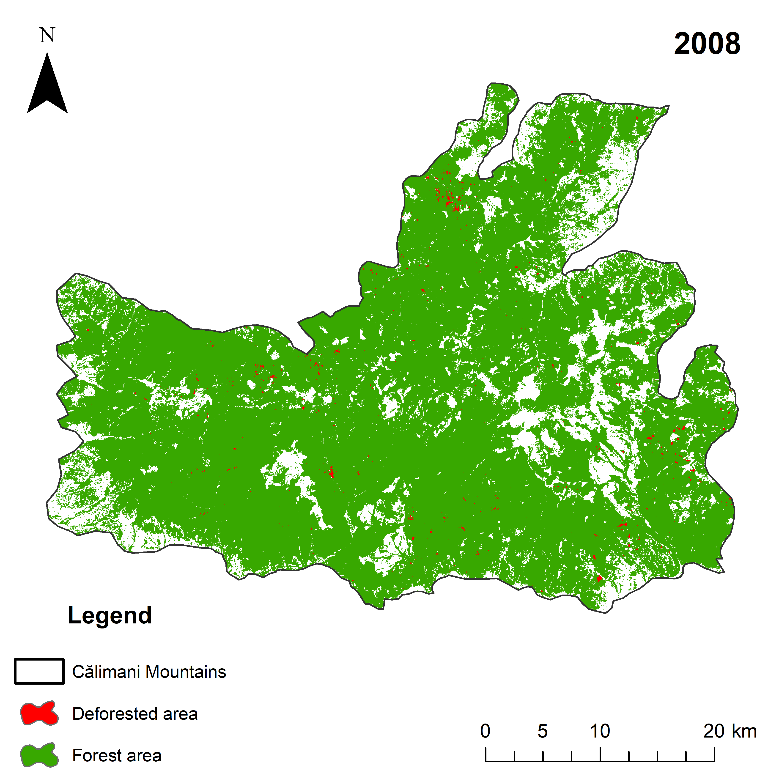 |

| 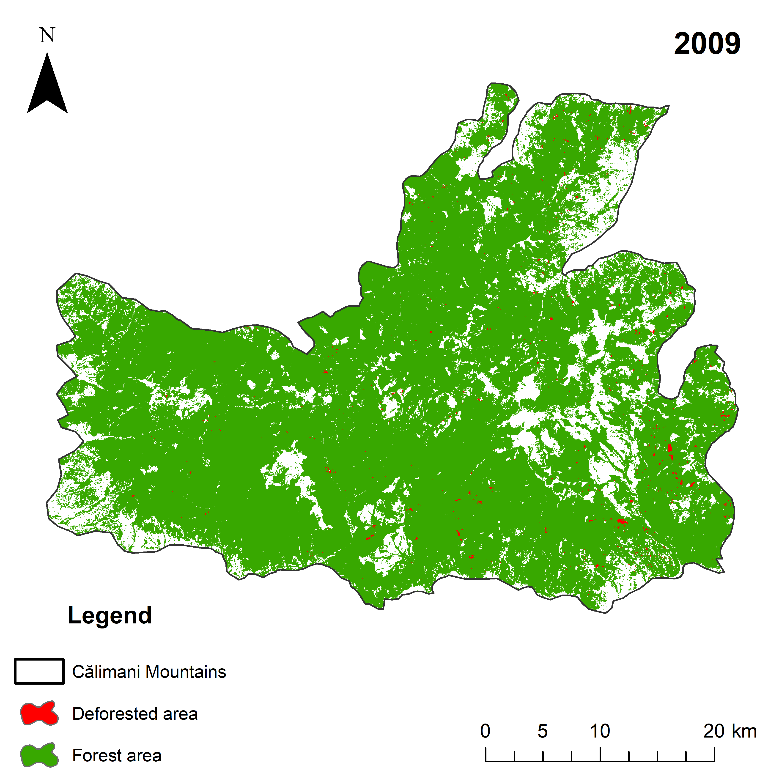 | 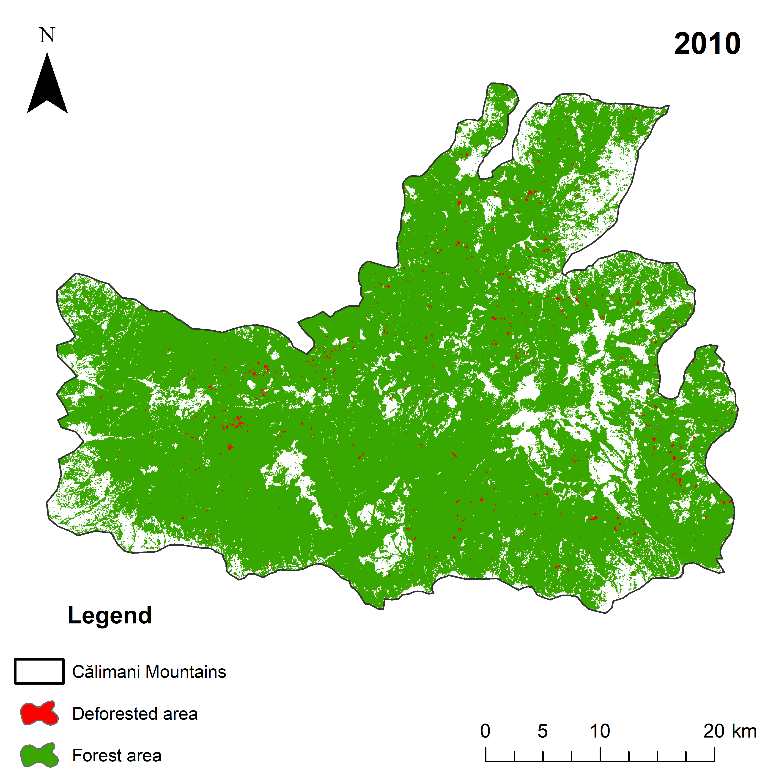 |
| --- | --- |
| 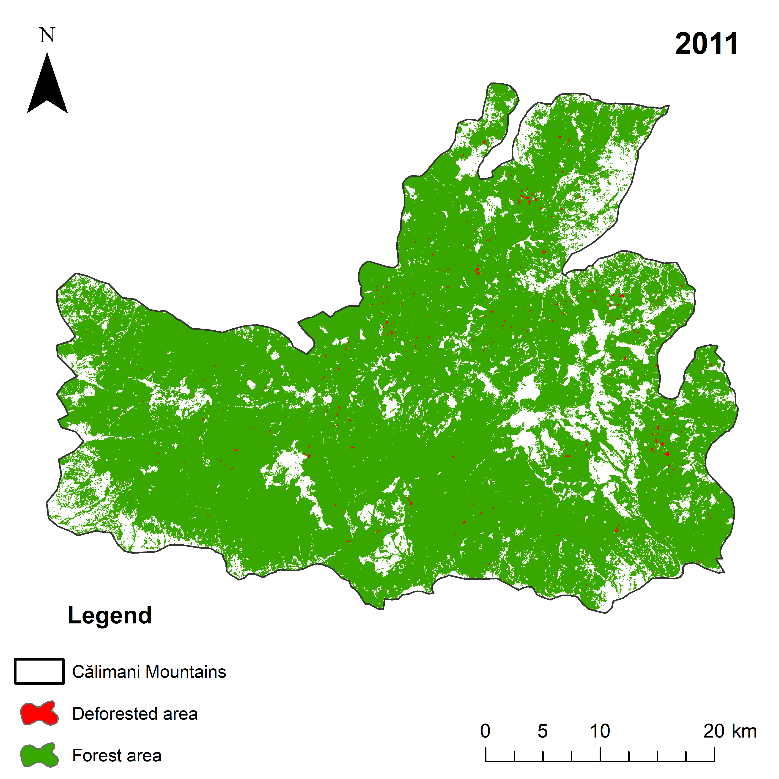 | 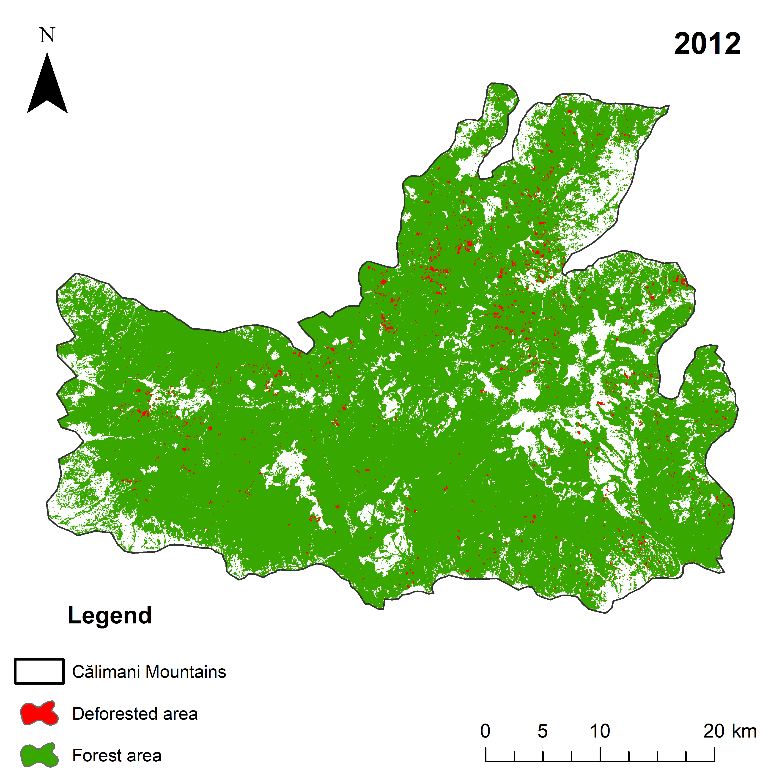 |

| 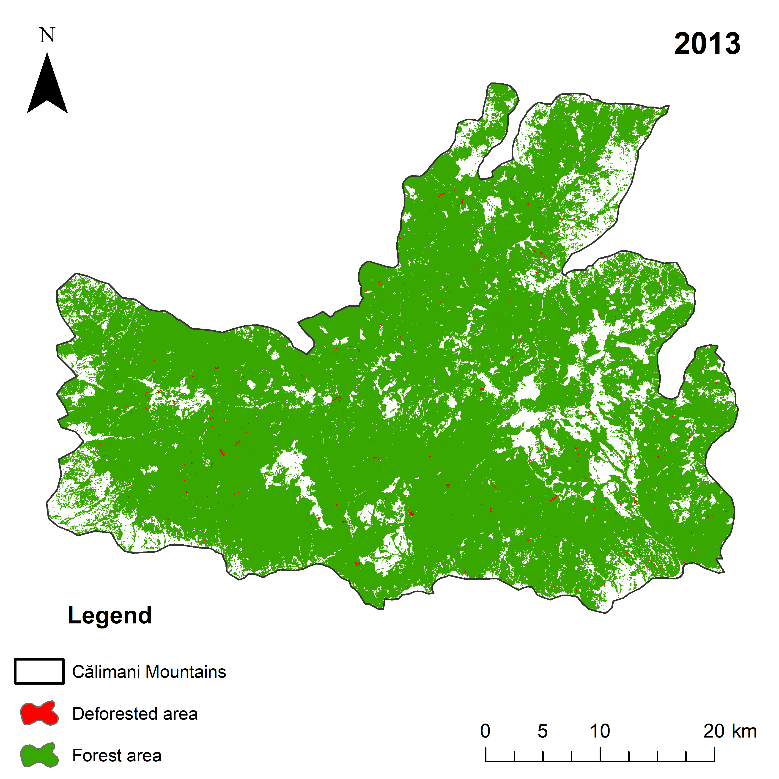 | 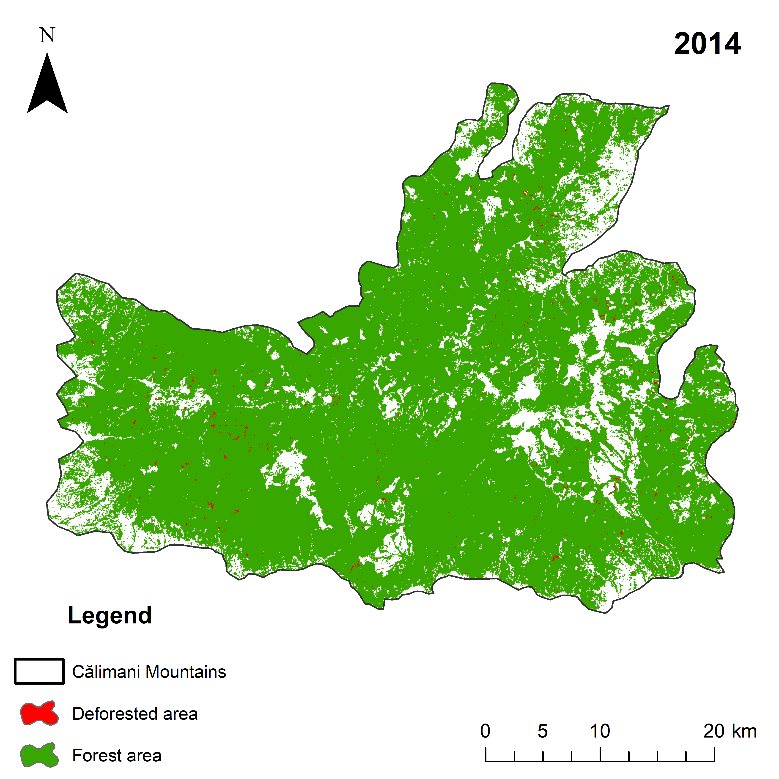 |
| --- | --- |
|  |  |
